# Supplementary material for: A DFT Study of Alkaline Earth Metal-Doped FAPbI3 (111) and (100) Surfaces
Source: MDPI journal article supplement (doi:10.3390/molecules28010372), 2023-01-02
Supplement: s1 [file s1]

## Supporting Information File

# A DFT Study of Alkaline Earth Metal-Doped FAPbI<sub>3</sub> (111) and (100) Surfaces

Maryam RaeisianAsl<sup>1</sup>, Saeedeh Sarabadani Tafreshi<sup>1,\*</sup> and Nora H. de Leeuw<sup>2,3,\*</sup>

<sup>1</sup> Department of Chemistry, Amirkabir University of Technology, No. 350, Hafez Avenue, Valiasr Square, Tehran 1591634311, Iran

<sup>2</sup> School of Chemistry, University of Leeds, Leeds LT2 9JT, UK

<sup>3</sup> Department of Earth Sciences, Utrecht University, 3584 CB Utrecht, The Netherlands

\* Correspondence: s.s.tafreshi@aut.ac.ir (S.S.T.);  
n.h.deleeuw@leeds.ac.uk (N.H.d.L.)

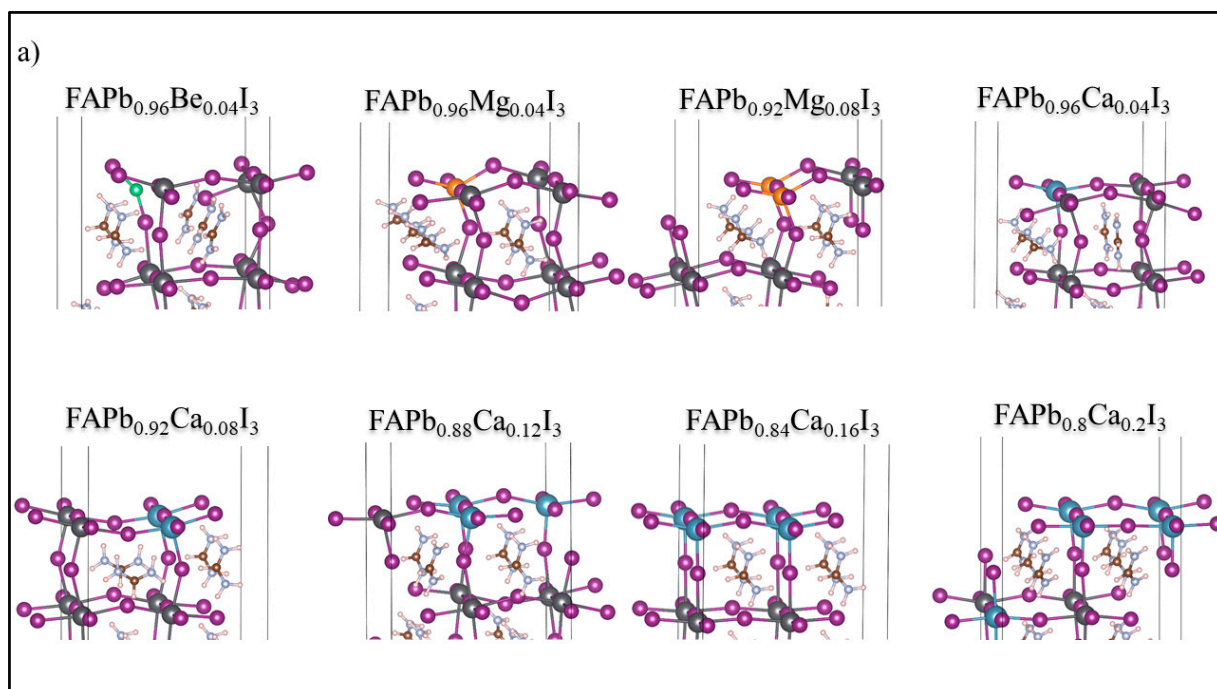

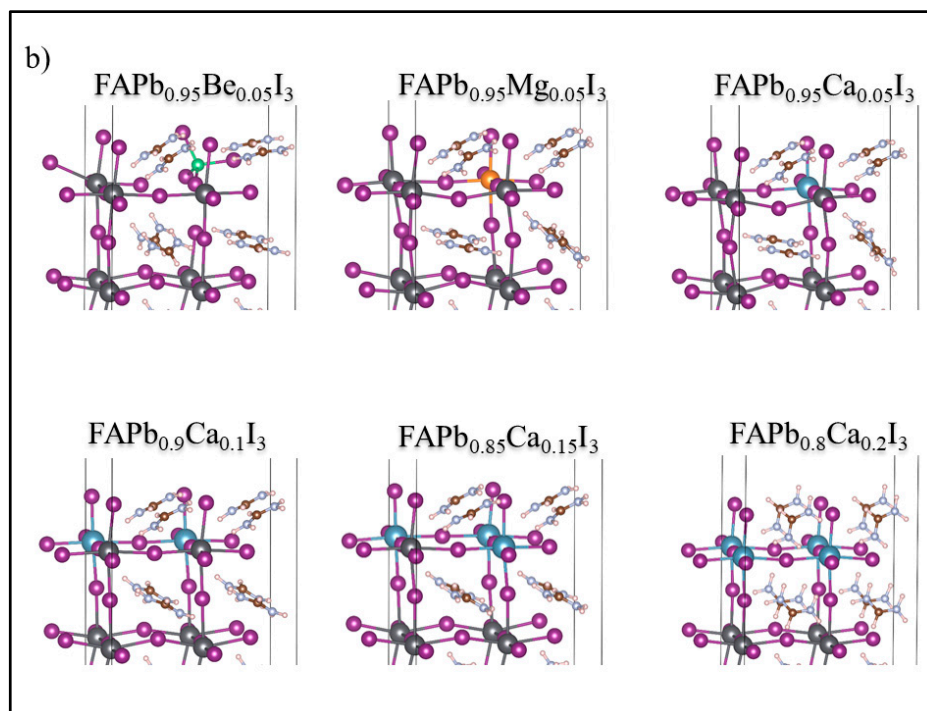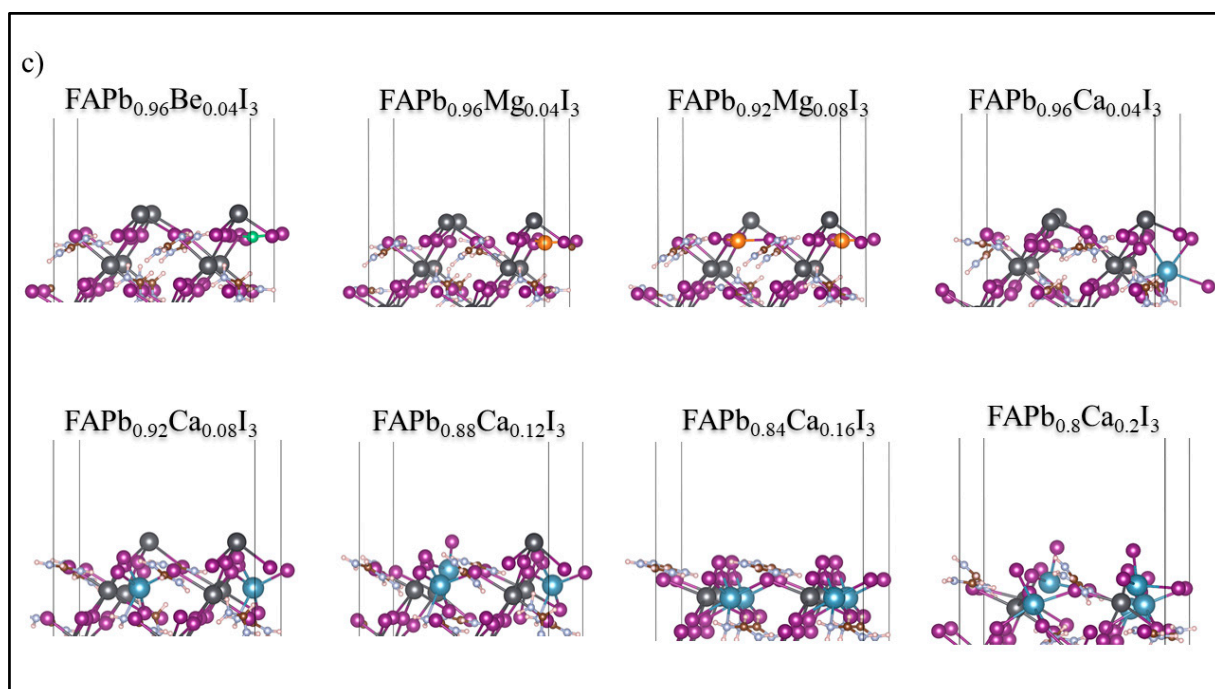

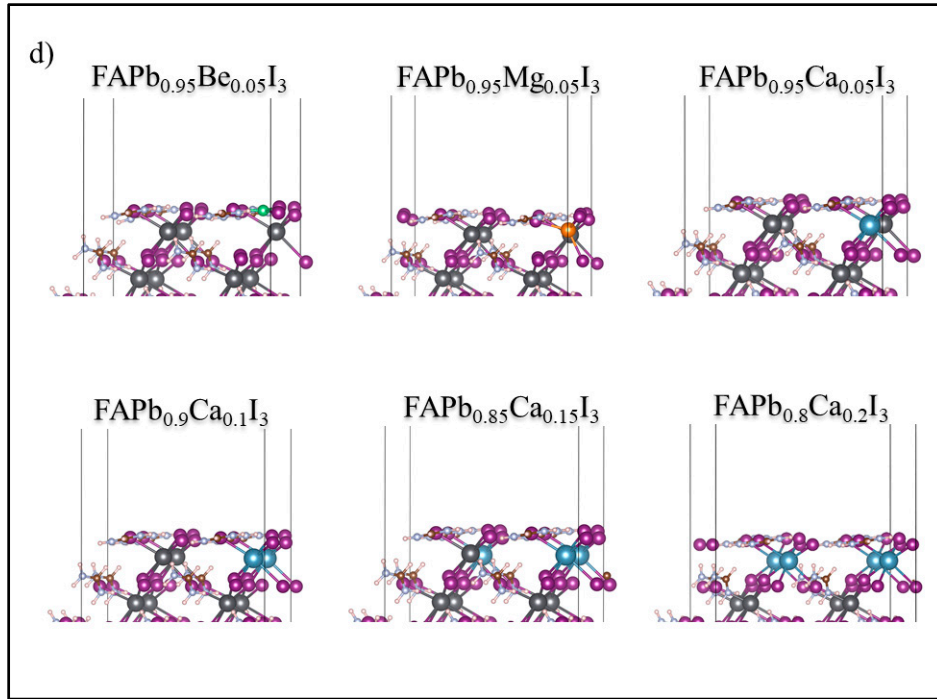

**Figure S1.** Three-dimensional (3D) depiction of Be (green), Mg (orange), and Ca (blue)-doped FAPI surfaces related to: a) (100)-PbI<sub>5</sub>, b) (100)-PbI<sub>6</sub>, c) (111)-PbI<sub>3</sub>, and d) (111)-PbI<sub>6</sub> terminations.

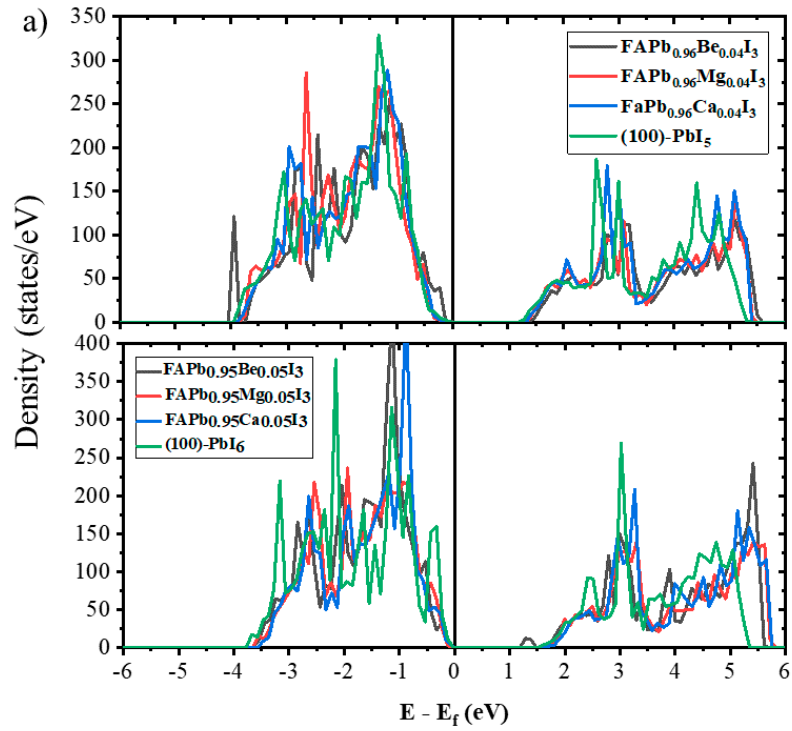

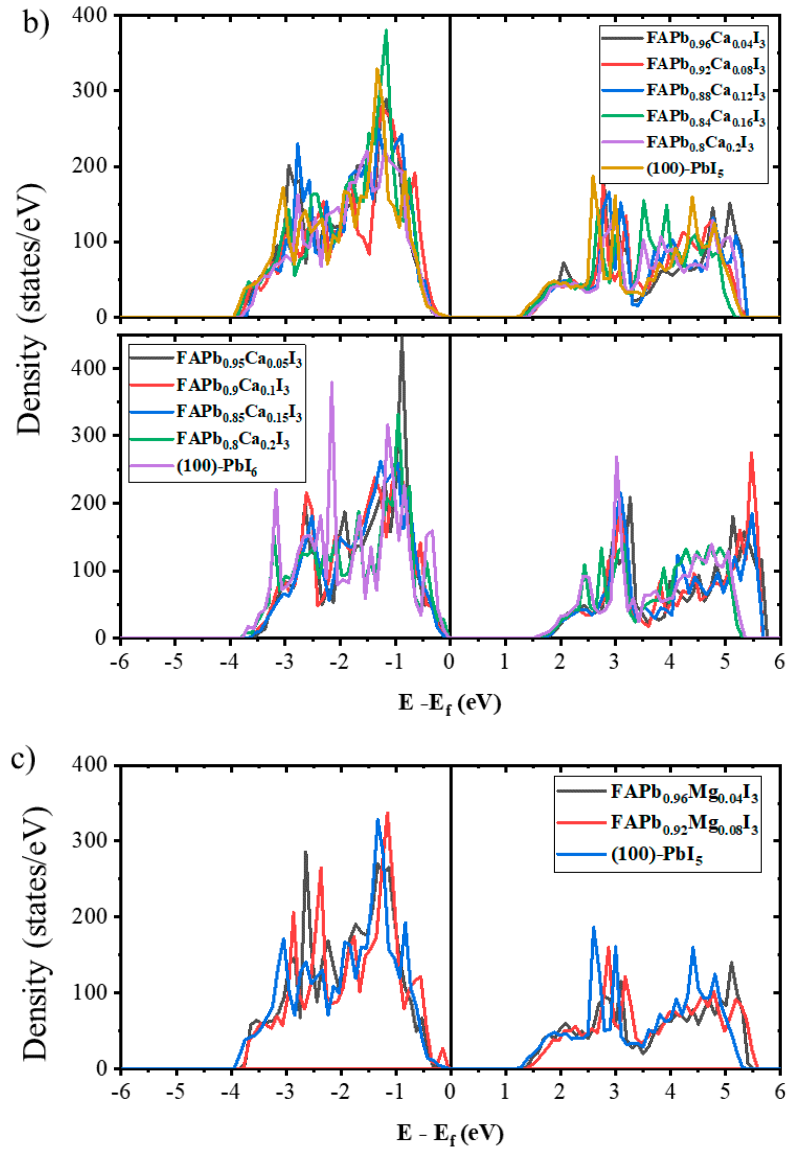

**Figure S2.** The total density of states for (100) surfaces with doping of a) 1 atom of Be, Mg, and Ca in PbI<sub>5</sub> and PbI<sub>6</sub> terminations, b) 1-4 atoms of Ca in PbI<sub>6</sub> and 1-5 atoms of Ca in PbI<sub>5</sub> terminations, and c) 1-2 atoms of Mg in PbI<sub>5</sub> termination. The Fermi level is set at zero eV.

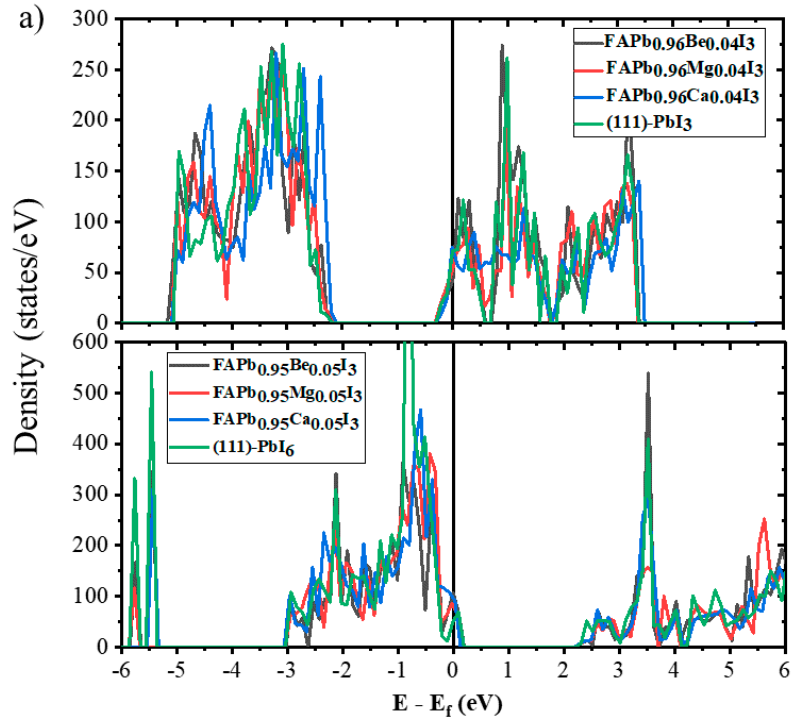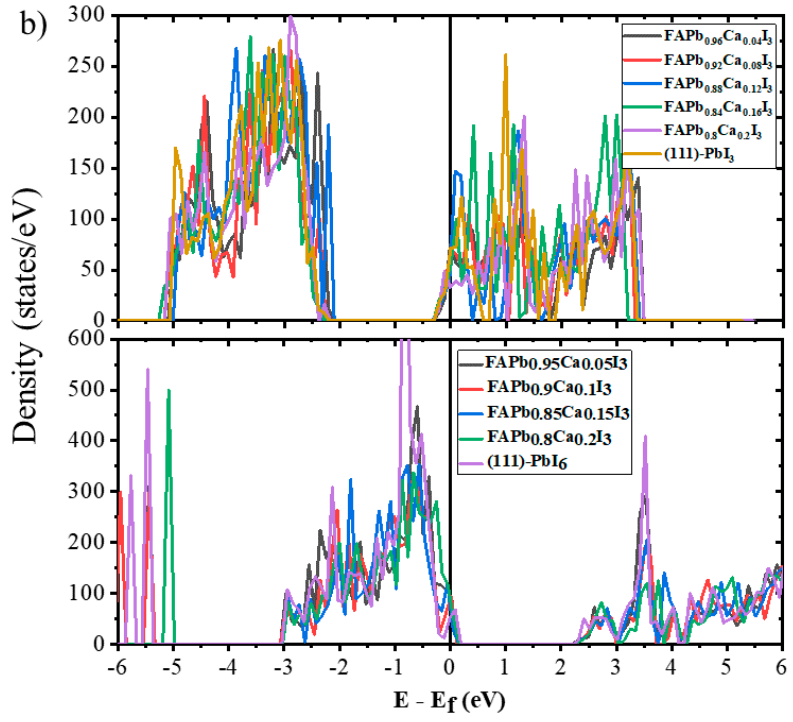

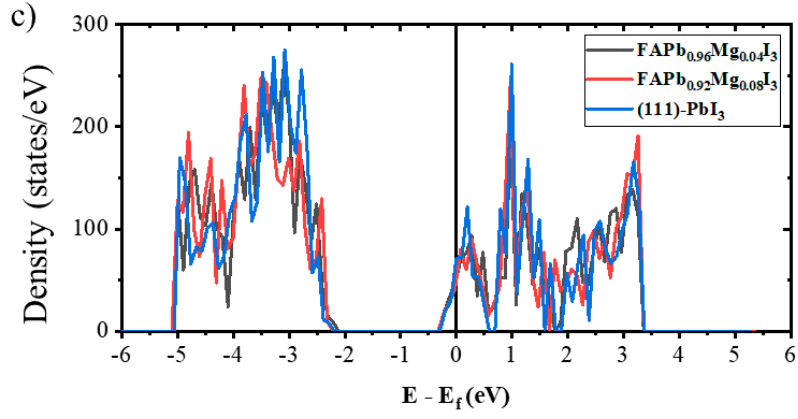

**Figure S3.** The total density of states for (111) surfaces with doping of a) 1 atom of Be, Mg, and Ca in  $\text{PbI}_3$  and  $\text{PbI}_6$  terminations, b) 1-4 atoms of Ca in  $\text{PbI}_6$  and 1-5 atoms of Ca in  $\text{PbI}_3$  terminations, and c) 1-2 atoms of Mg in  $\text{PbI}_3$  termination. The Fermi level is set at zero eV.

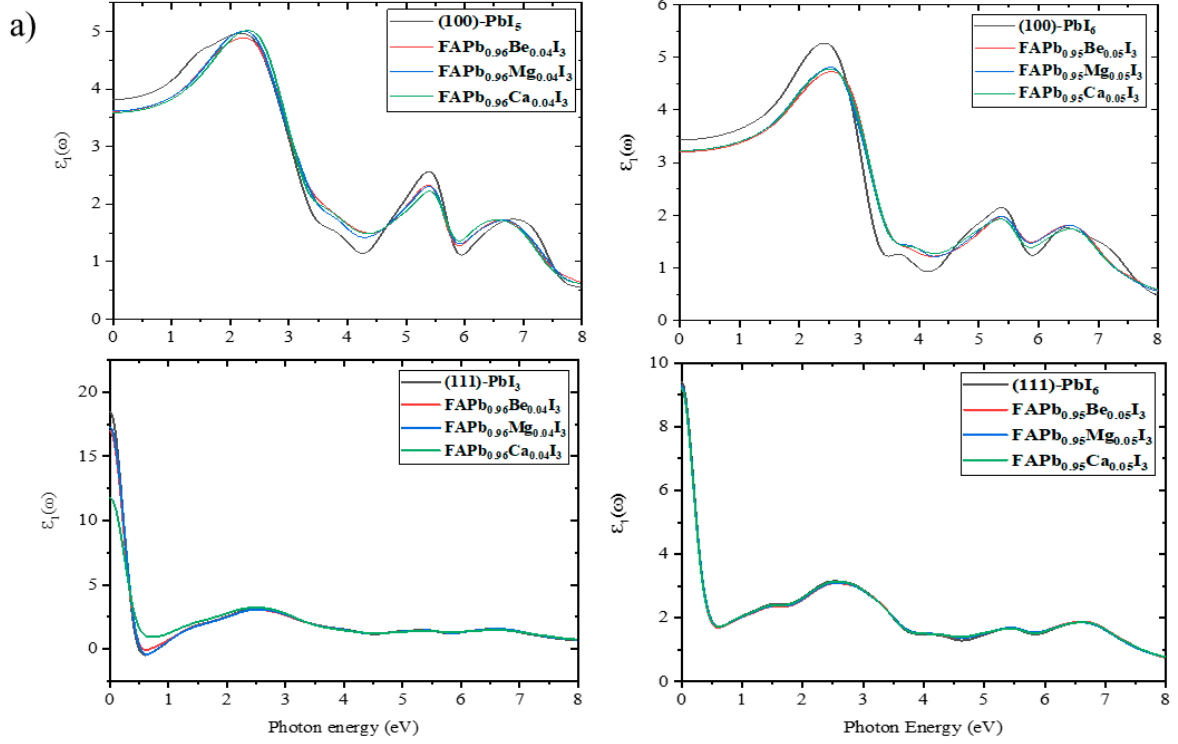

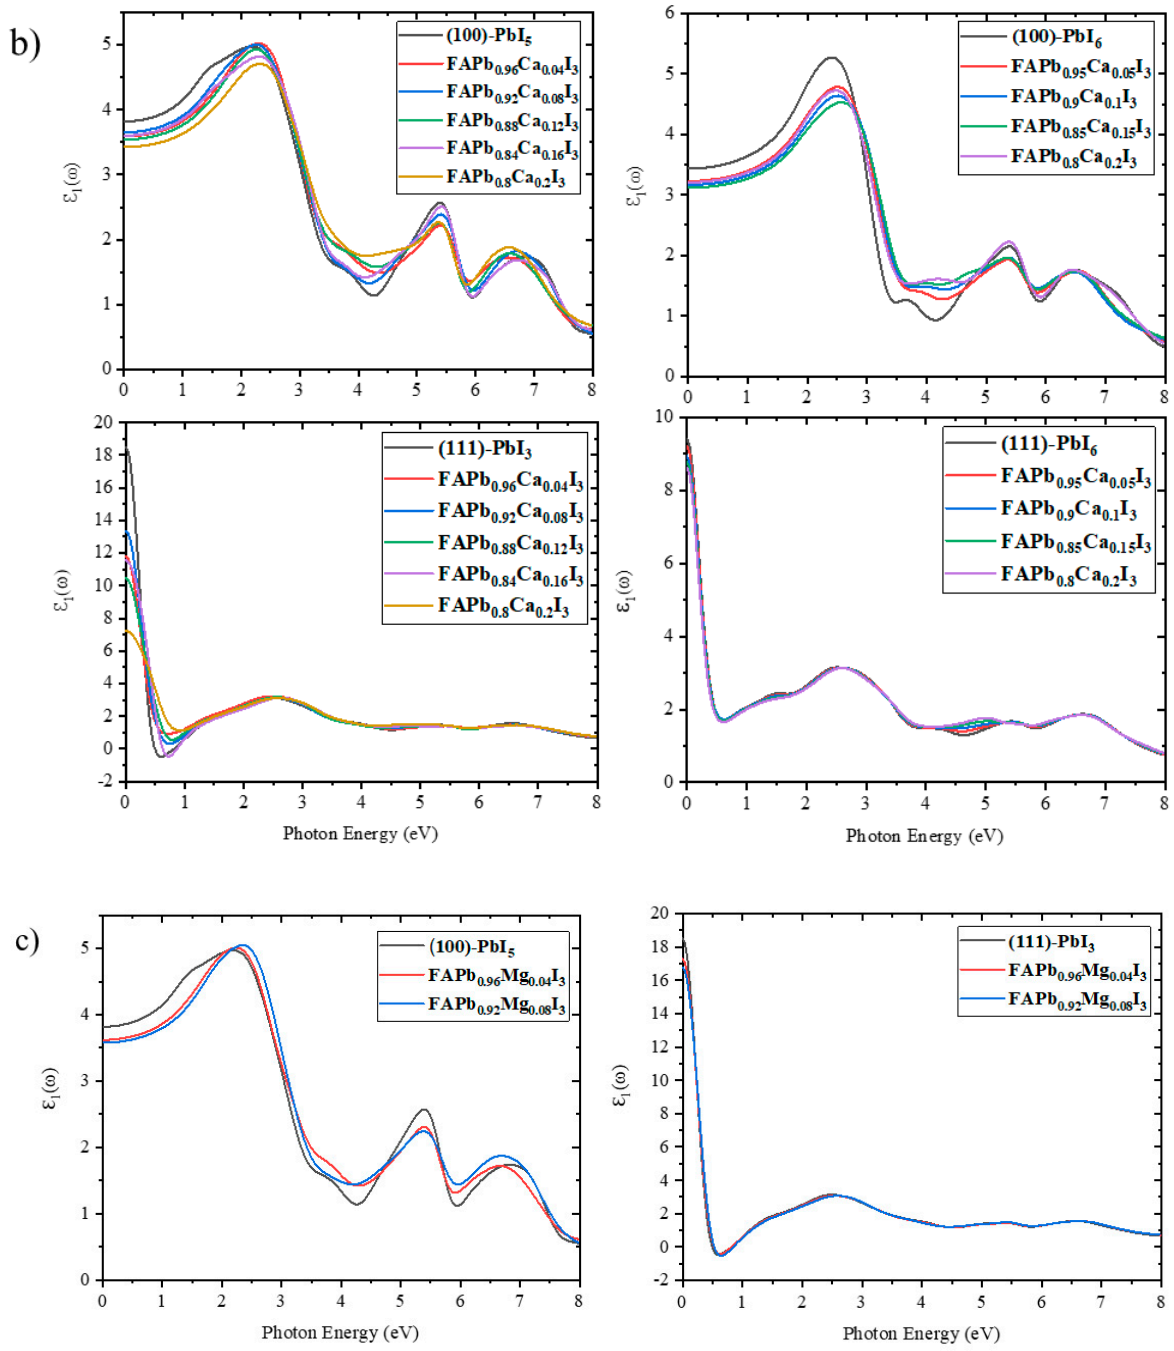

**Figure S4.** The real part of dielectric function for (100) and (111) surfaces with doping of a) 1 atom of Be, Mg, and Ca in all terminations, b) 1-4 atoms of Ca in both PbI<sub>6</sub> terminations and 1-5 atoms of Ca in PbI<sub>5</sub> and PbI<sub>3</sub> terminations, and c) 1-2 atoms of Mg in PbI<sub>3</sub> and PbI<sub>5</sub> terminations.

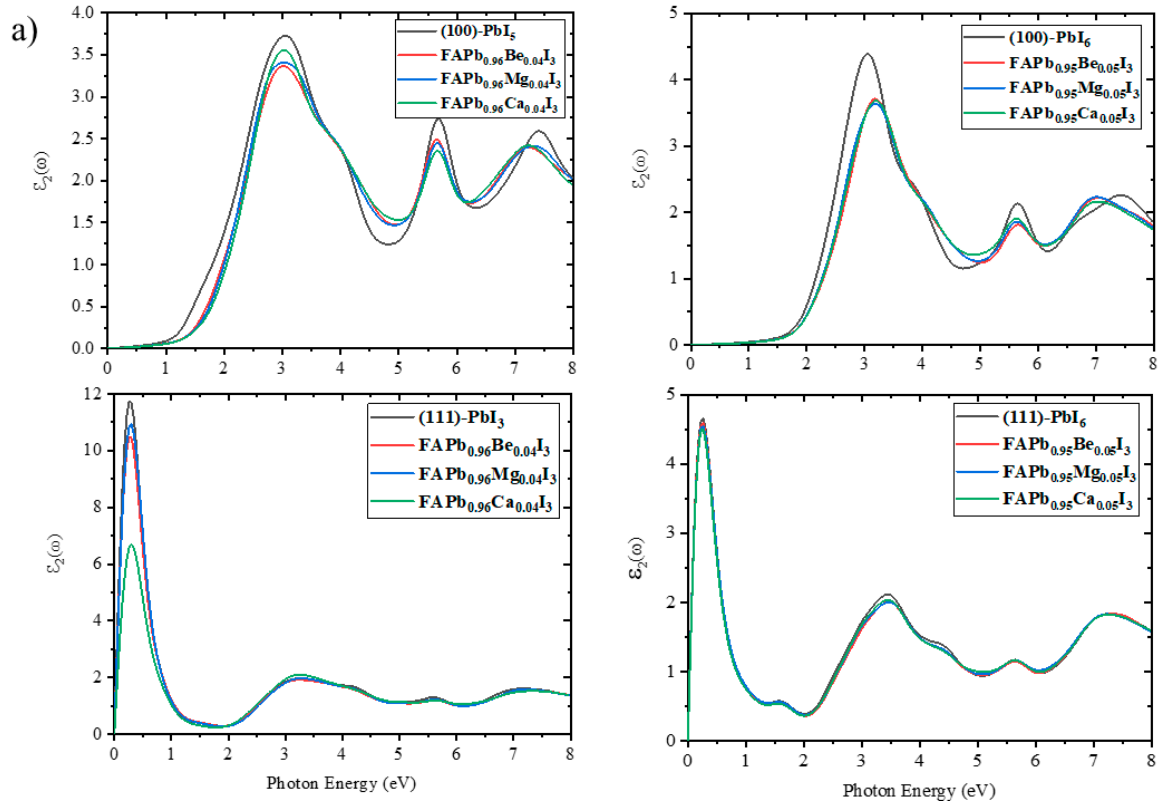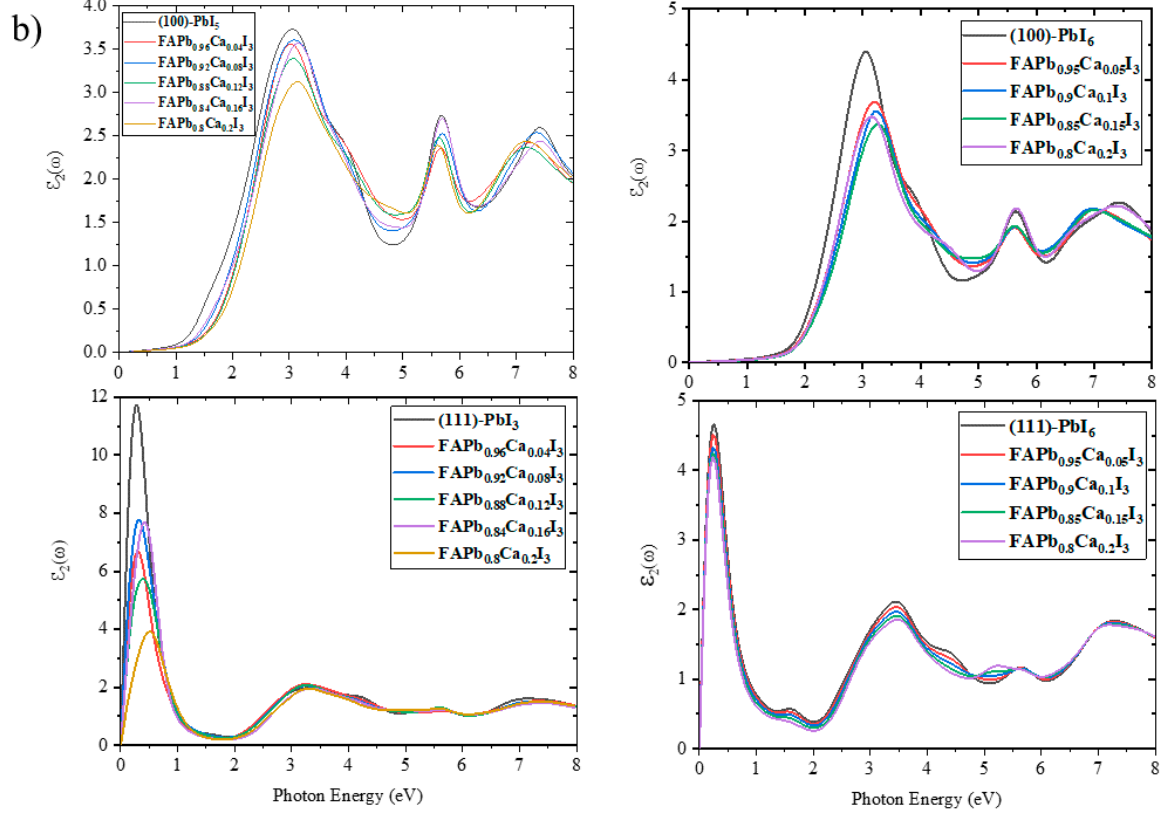



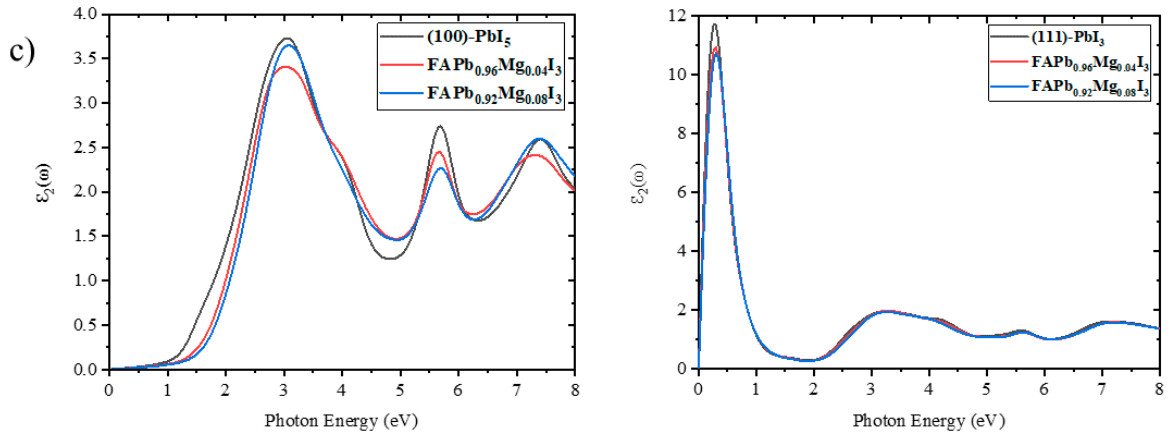

**Figure S5.** The imaginary part of dielectric function for (100) and (111) surfaces with doping of a) 1 atom of Be, Mg, and Ca in all terminations, b) 1-4 atoms of Ca in both PbI<sub>6</sub> terminations and 1-5 atoms of Ca in PbI<sub>3</sub> and PbI<sub>5</sub> terminations, and c) 1-2 atoms of Mg in PbI<sub>3</sub> and PbI<sub>5</sub> terminations.

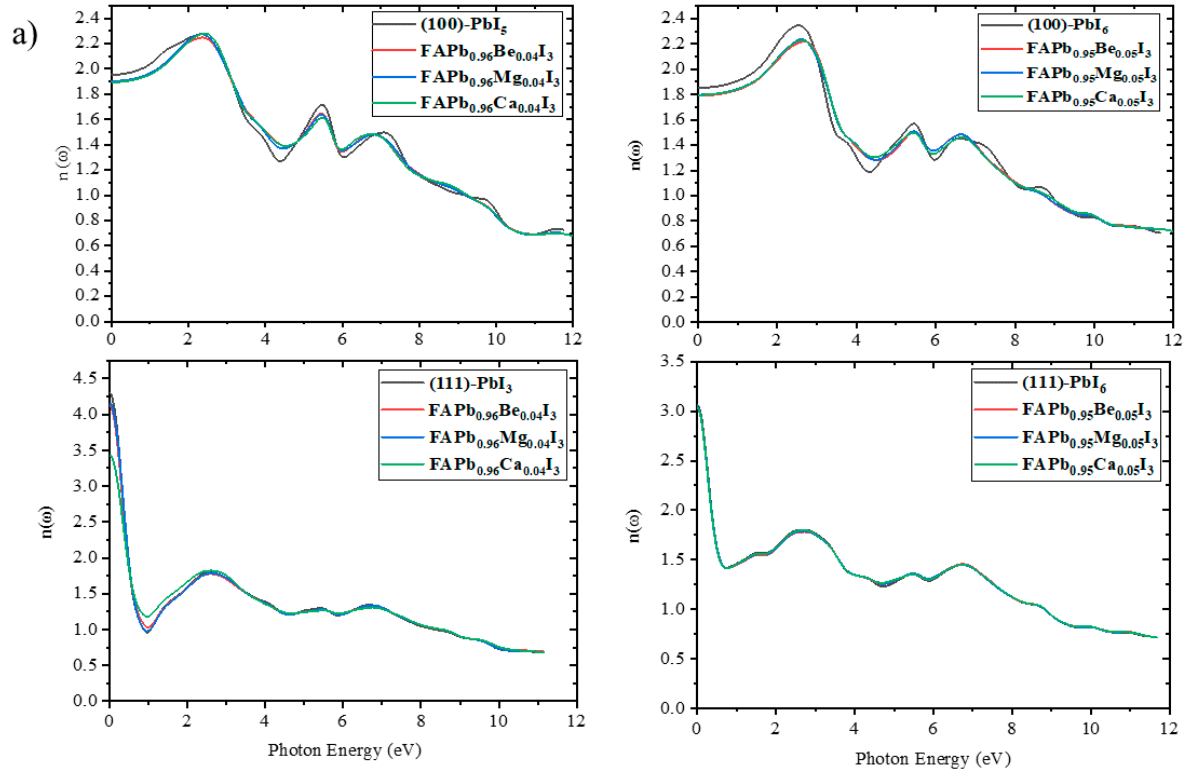

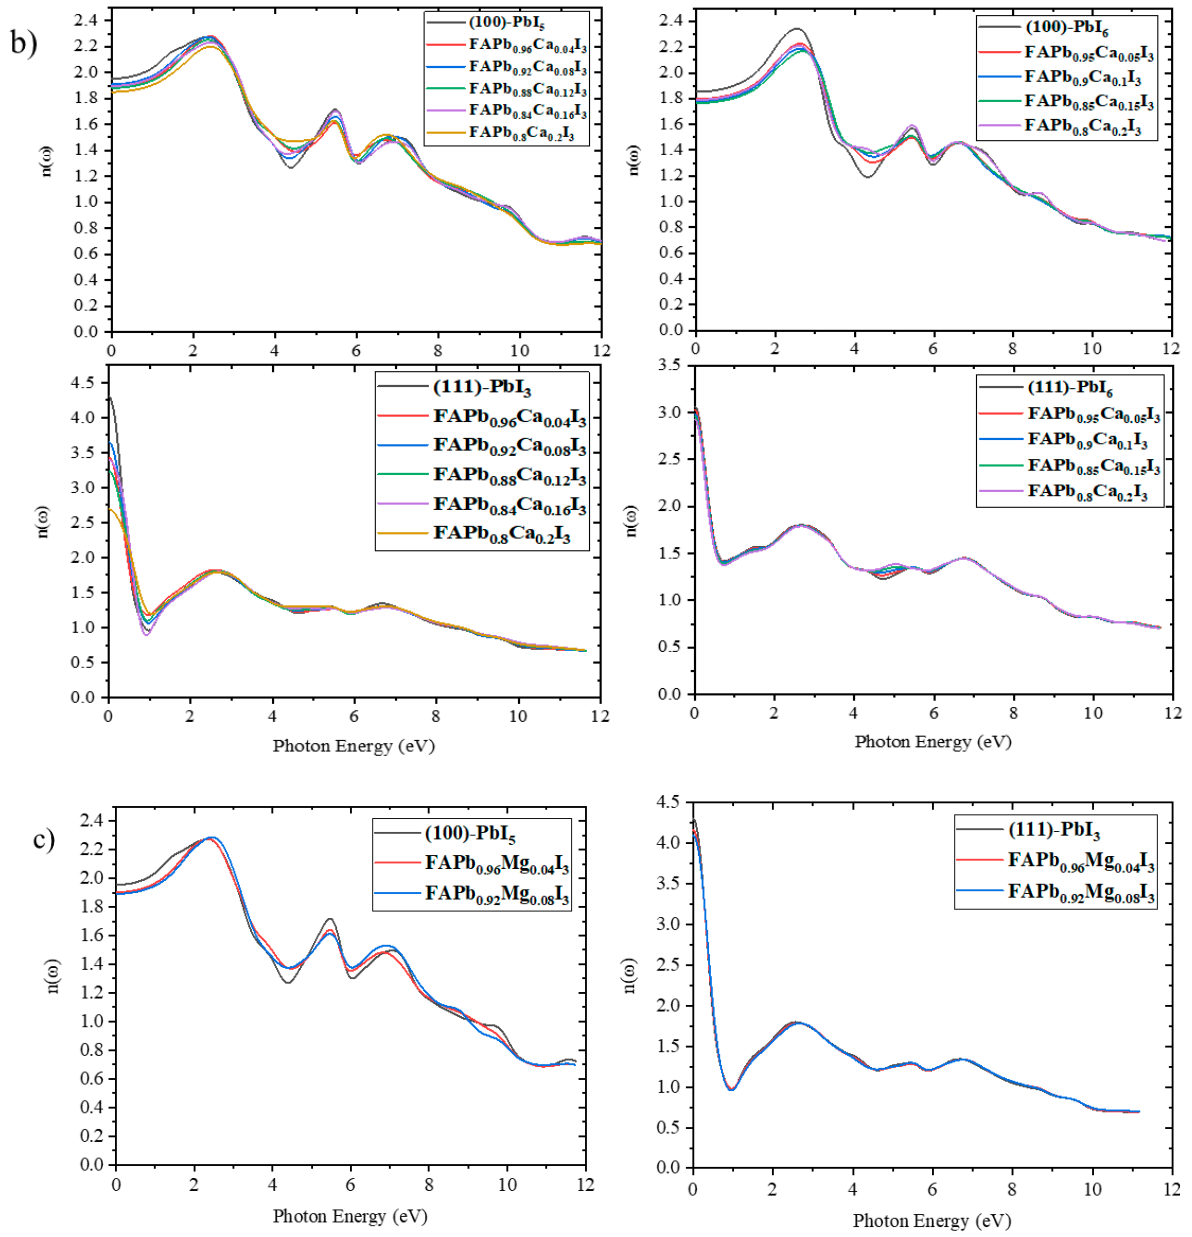

**Figure S6.** The refractive index spectra for for (100) and (111) surfaces with doping of a) 1 atom of Be, Mg, and Ca in all terminations, b) 1-4 atoms of Ca in both  $\text{PbI}_5$  terminations and 1-5 atoms of Ca in  $\text{PbI}_5$  and  $\text{PbI}_3$  terminations, and c) 1-2 atoms of Mg in  $\text{PbI}_3$  and  $\text{PbI}_5$  terminations.

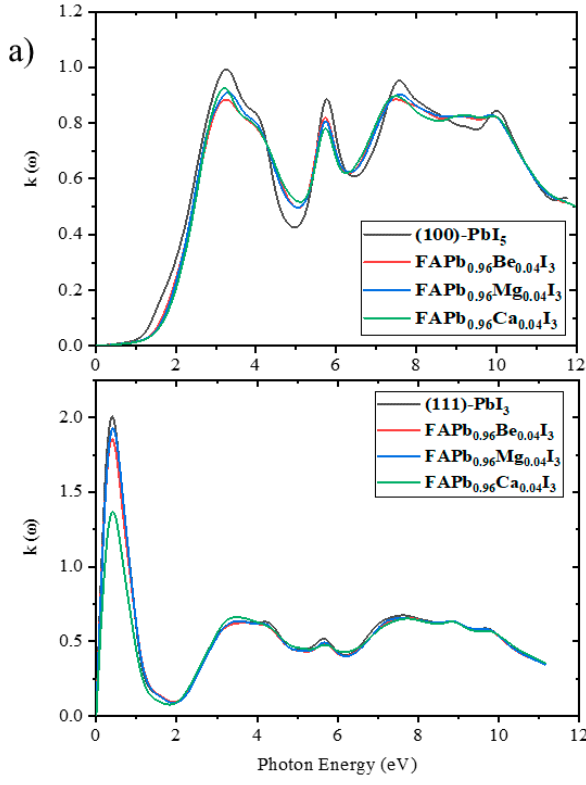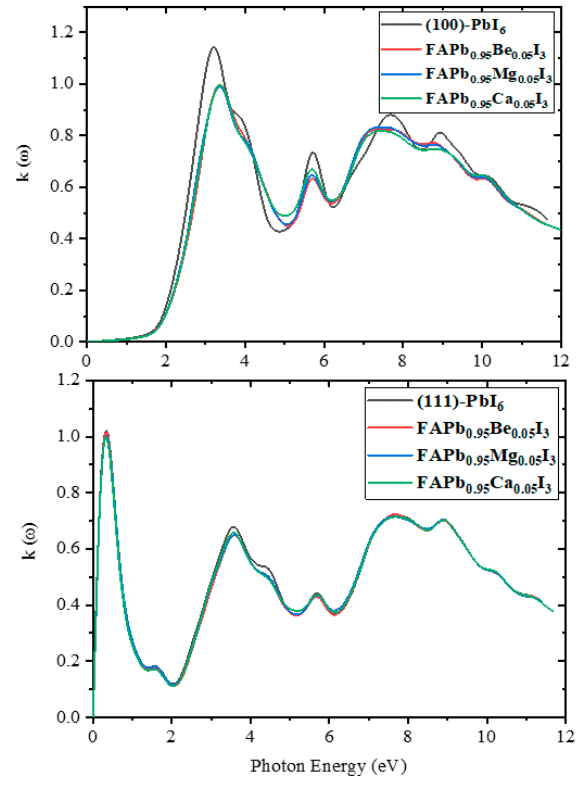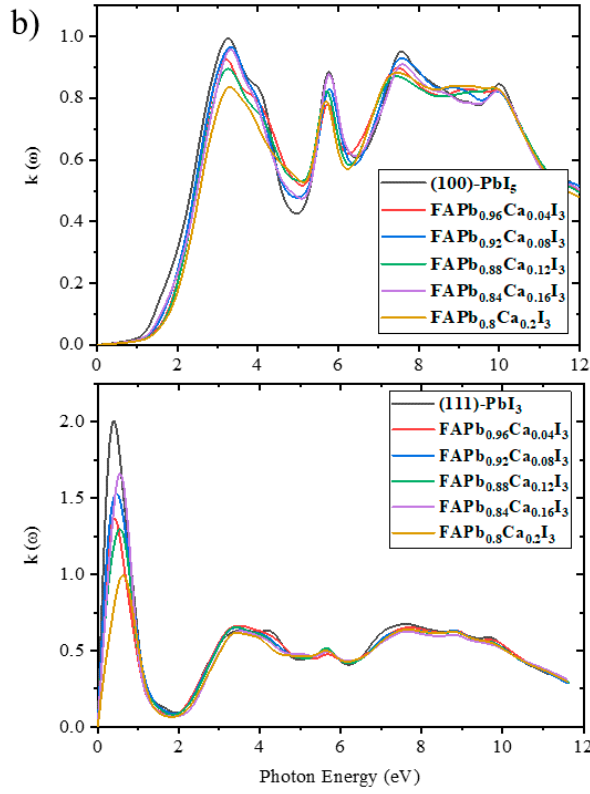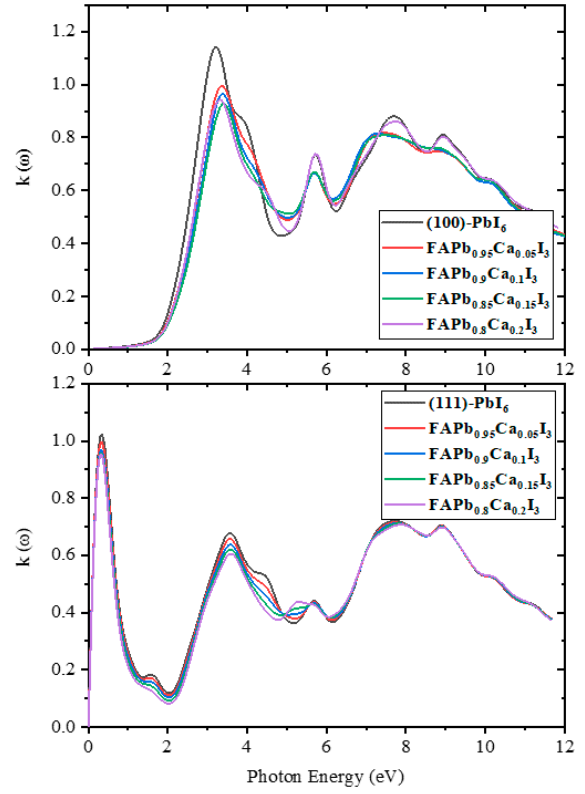

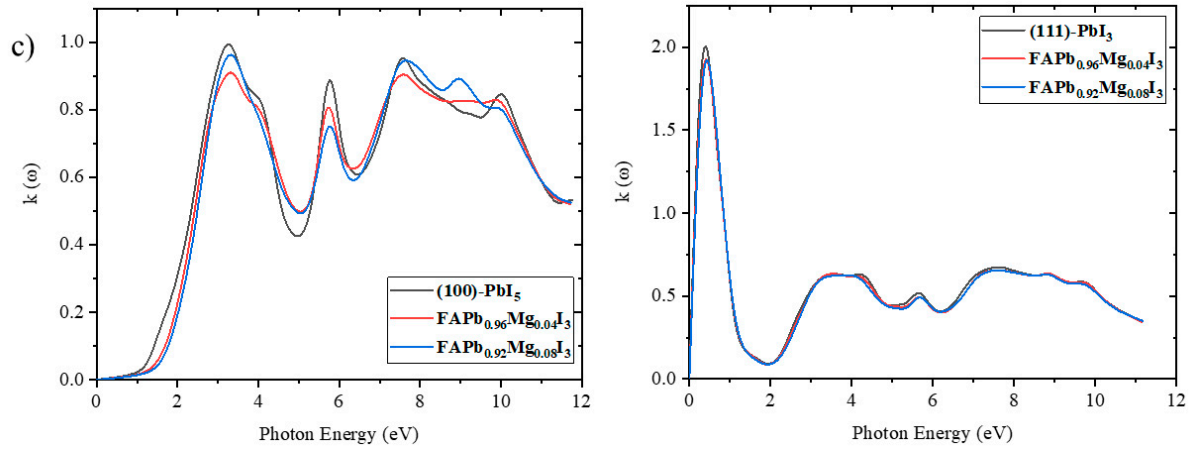

**Figure S7.** The extinction coefficient for (100) and (111) surfaces with doping of a) 1 atom of Be, Mg, and Ca in all terminations, b) 1-4 atoms of Ca in both PbI<sub>6</sub> terminations and 1-5 atoms of Ca in PbI<sub>5</sub> and PbI<sub>3</sub> terminations, and c) 1-2 atoms of Mg in PbI<sub>3</sub> and PbI<sub>5</sub> terminations.

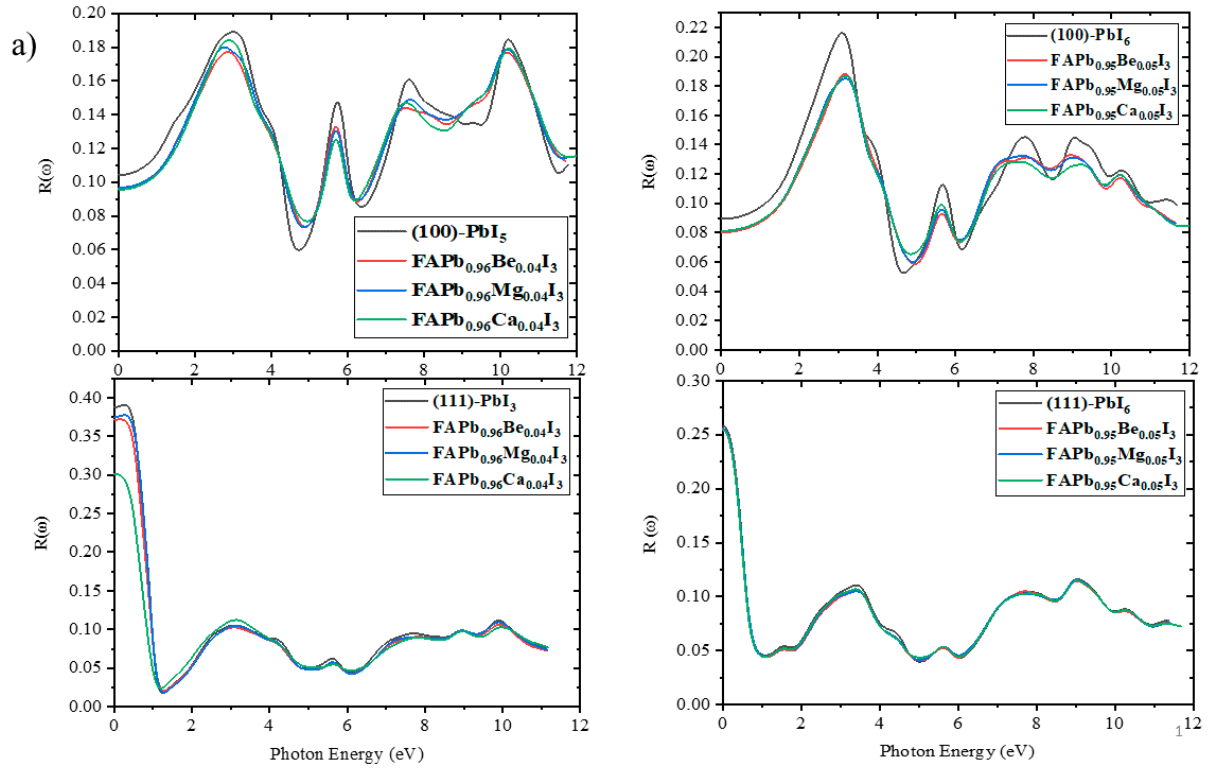

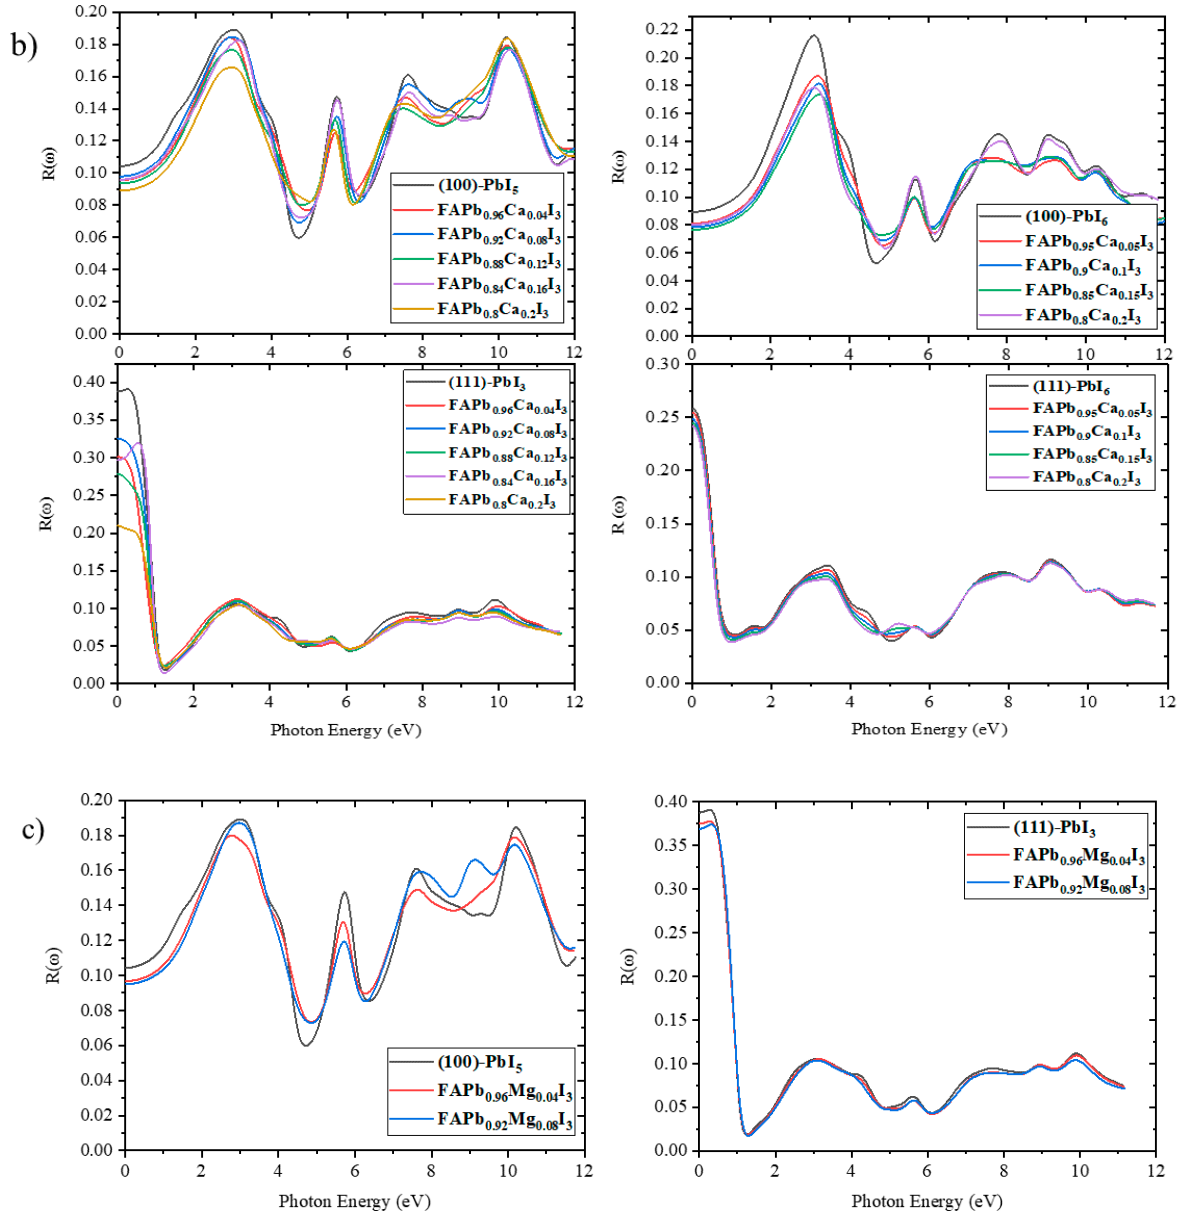

**Figure S8.** The reflectivity spectra for (100) and (111) surfaces with doping of a) 1 atom of Be, Mg, and Ca in all terminations, b) 1-4 atoms of Ca in both PbI<sub>6</sub> terminations and 1-5 atoms of Ca in PbI<sub>5</sub> and PbI<sub>3</sub> terminations, and c) 1-2 atoms of Mg in PbI<sub>3</sub> and PbI<sub>5</sub> terminations.

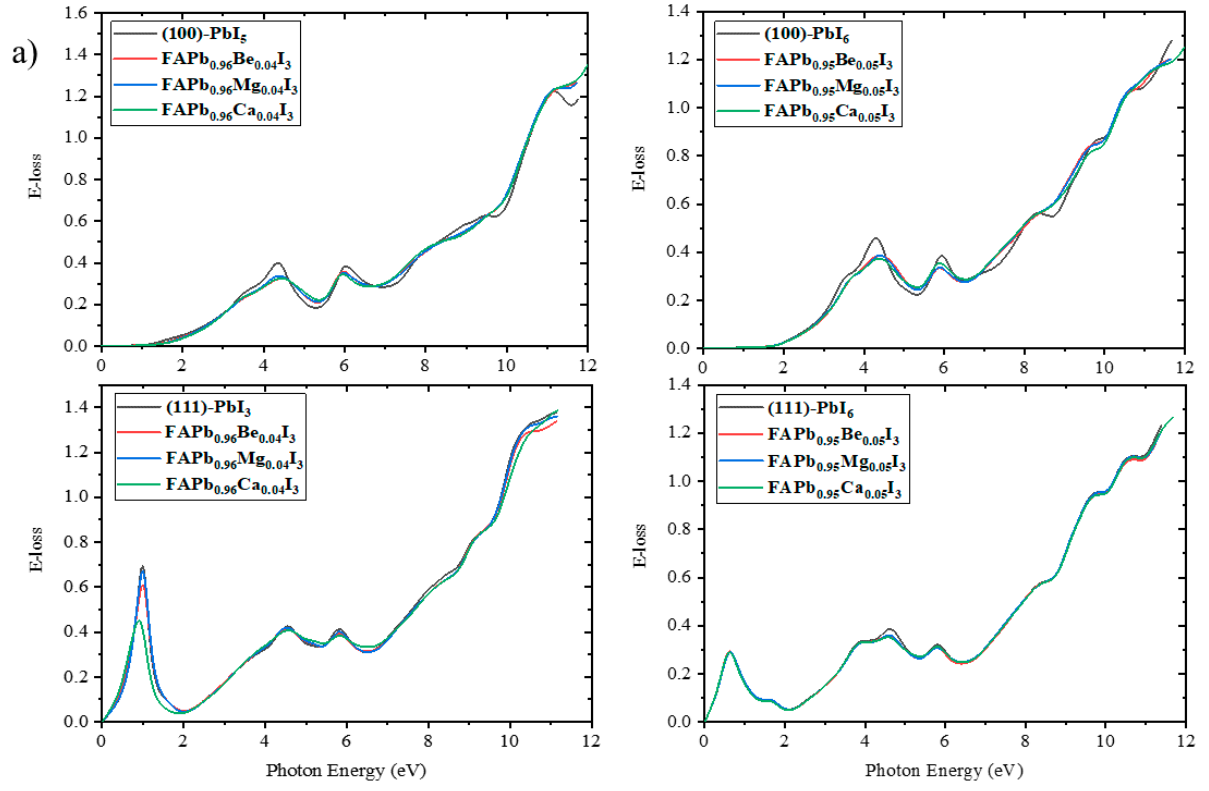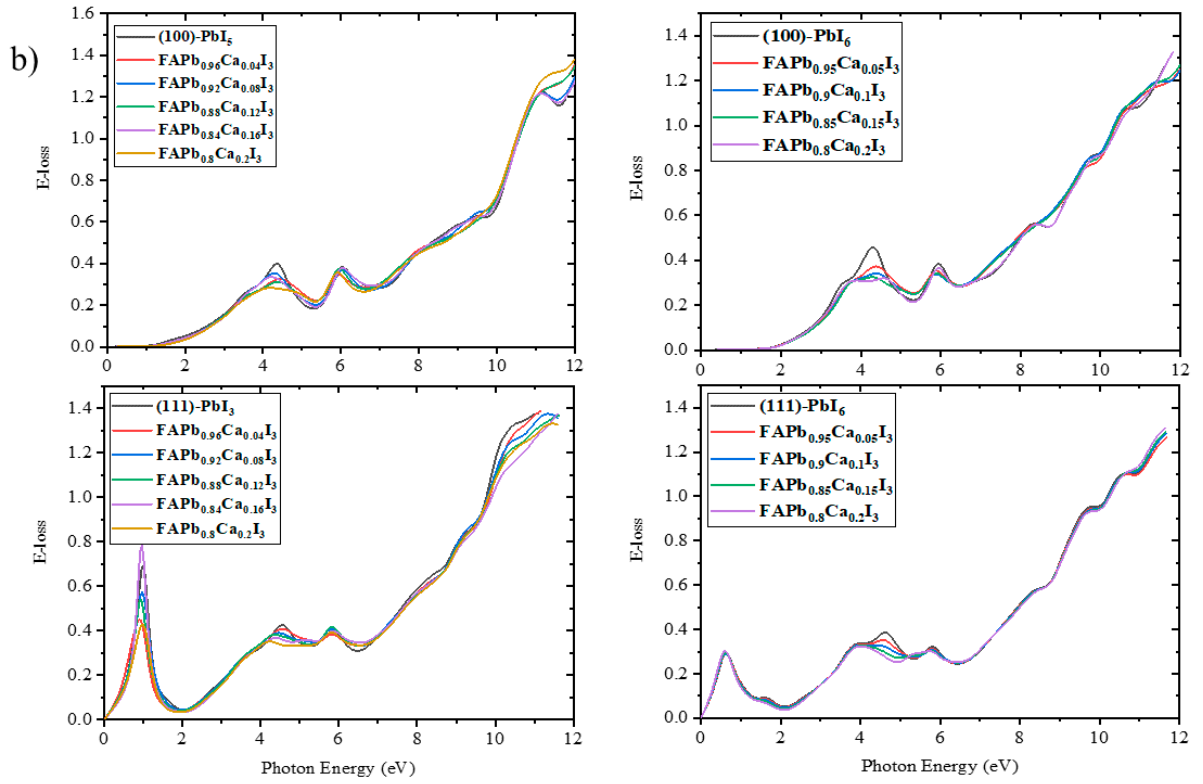

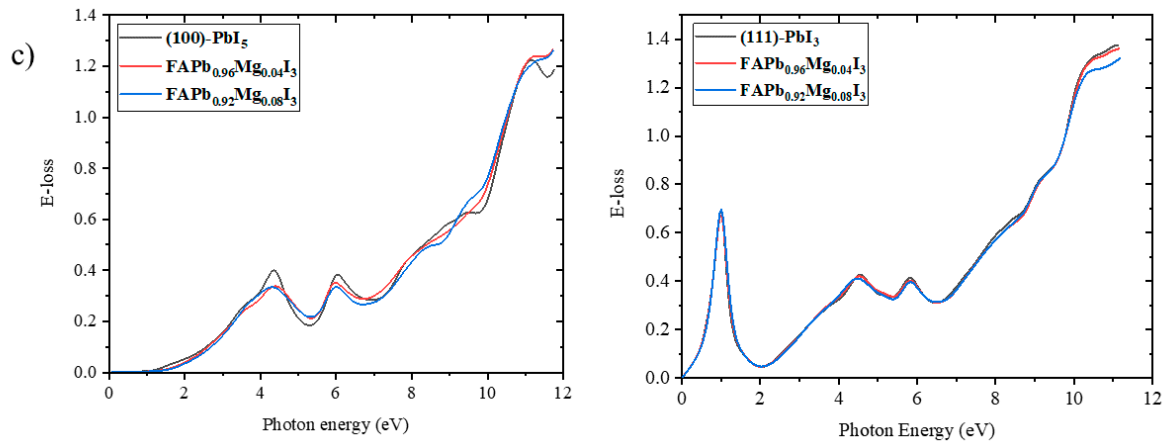

**Figure S9.** The electron energy loss function versus photon energy for (100) and (111) surfaces with doping of a) 1 atom of Be, Mg, and Ca in all terminations, b) 1-4 atoms of Ca in both  $\text{PbI}_5$  terminations and 1-5 atoms of Ca in  $\text{PbI}_5$  and  $\text{PbI}_3$  terminations, and c) 1-2 atoms of Mg in  $\text{PbI}_3$  and  $\text{PbI}_5$  terminations.
